# Supplementary material for: Improved thermal stability of ionic liquids through a hydrogen bond donor as an electrolyte for use in fluoride-ion batteries
Source: Royal Society of Chemistry journal article supplement (doi:10.1039/d5cp03561a), 2025-01-01
Supplement: d5cp03561a1.pdf [file d5cp03561a1.pdf]

## Supplementary information

### Improved Thermal Stability of Ionic Liquid through Hydrogen Bond Donor as an Electrolyte for Fluoride-Ion Battery

Kaviarasan Govindarajan,<sup>a</sup> Ryo Sakamoto,<sup>b\*</sup> Susumu Kukita,<sup>b</sup> Reiji Takekawa,<sup>c</sup> Yuto Miyahara,<sup>a</sup> Kohei Miyazaki,<sup>a</sup> and Takeshi Abe.<sup>a</sup>

<sup>a</sup> Graduate School of Engineering, Kyoto University, Nishikyo-ku, Kyoto 615–8510, Japan

<sup>b</sup> Office of Institutional Advancement and Communications, Kyoto University, Nishikyo-ku, Kyoto 615–8510, Japan.

<sup>c</sup> Institute of Multidisciplinary Research for Advanced Materials, Tohoku University, 2-1-1 Katahira, Aoba-ku, Sendai, 980-8577, Japan

*\*Corresponding author : sakamoto.ryo.6n@kyoto-u.ac.jp*

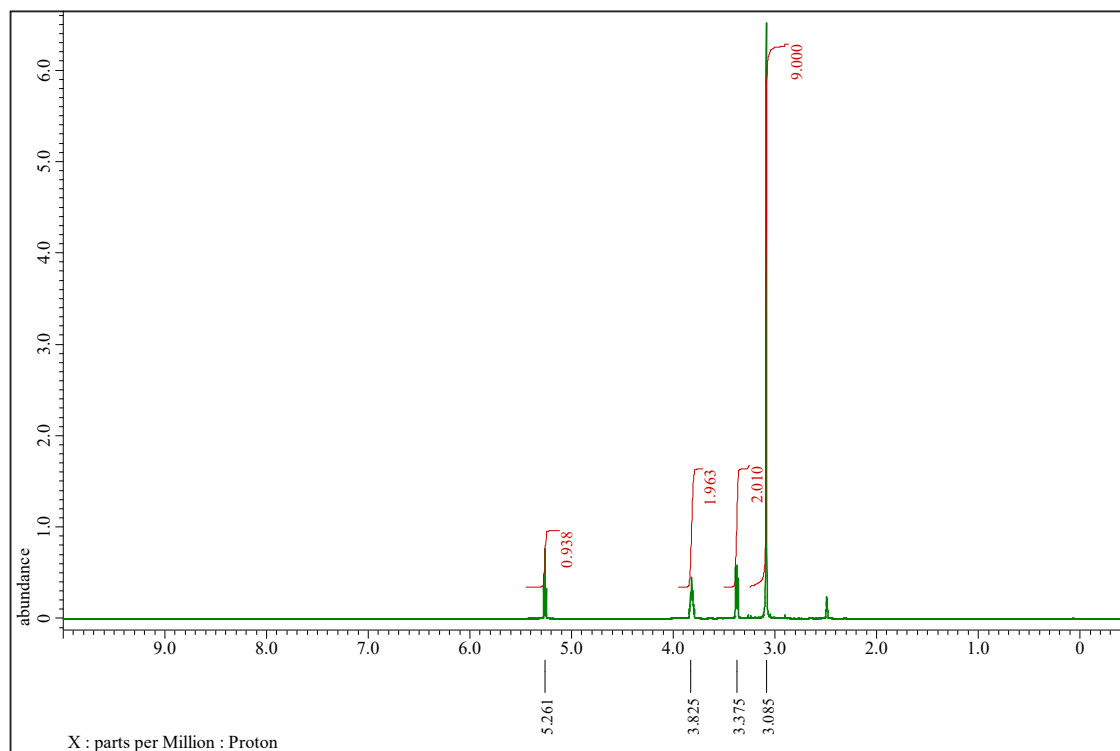

Figure S1.  $^1\text{H}$  NMR spectrum of the synthesized  $\text{N}_{111}(2\text{OH})\text{TFSA}$  in  $\text{DMSO}-d_6$ .

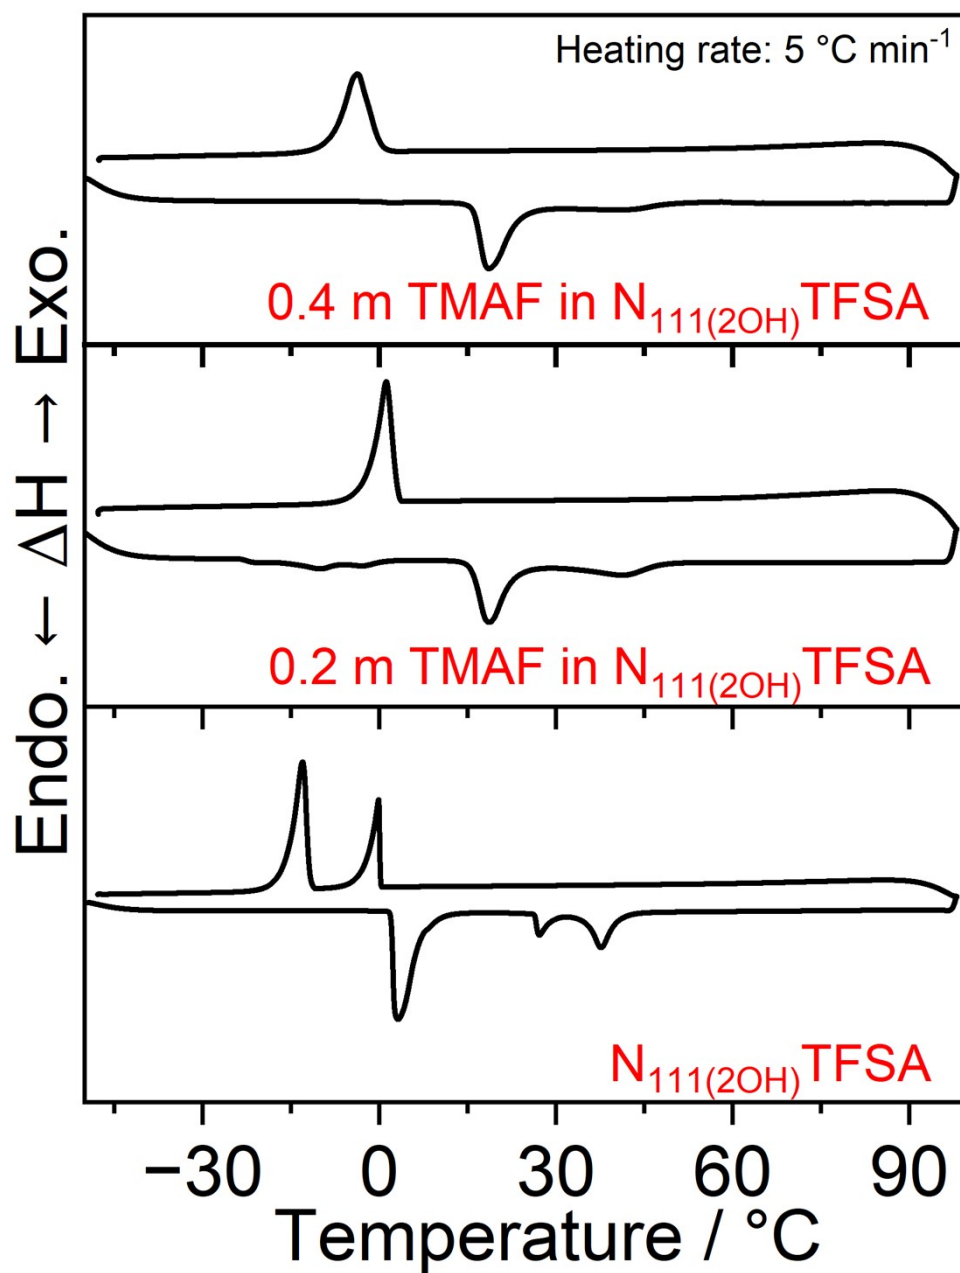

Figure S2. Full-range DSC curves of N<sub>111</sub>(2OH)TFSA with different concentrations of TMAF (0, 0.2, and 0.4 m) at a heating rate of 5 °C min<sup>-1</sup>, corresponding to the data shown in Figure 2.

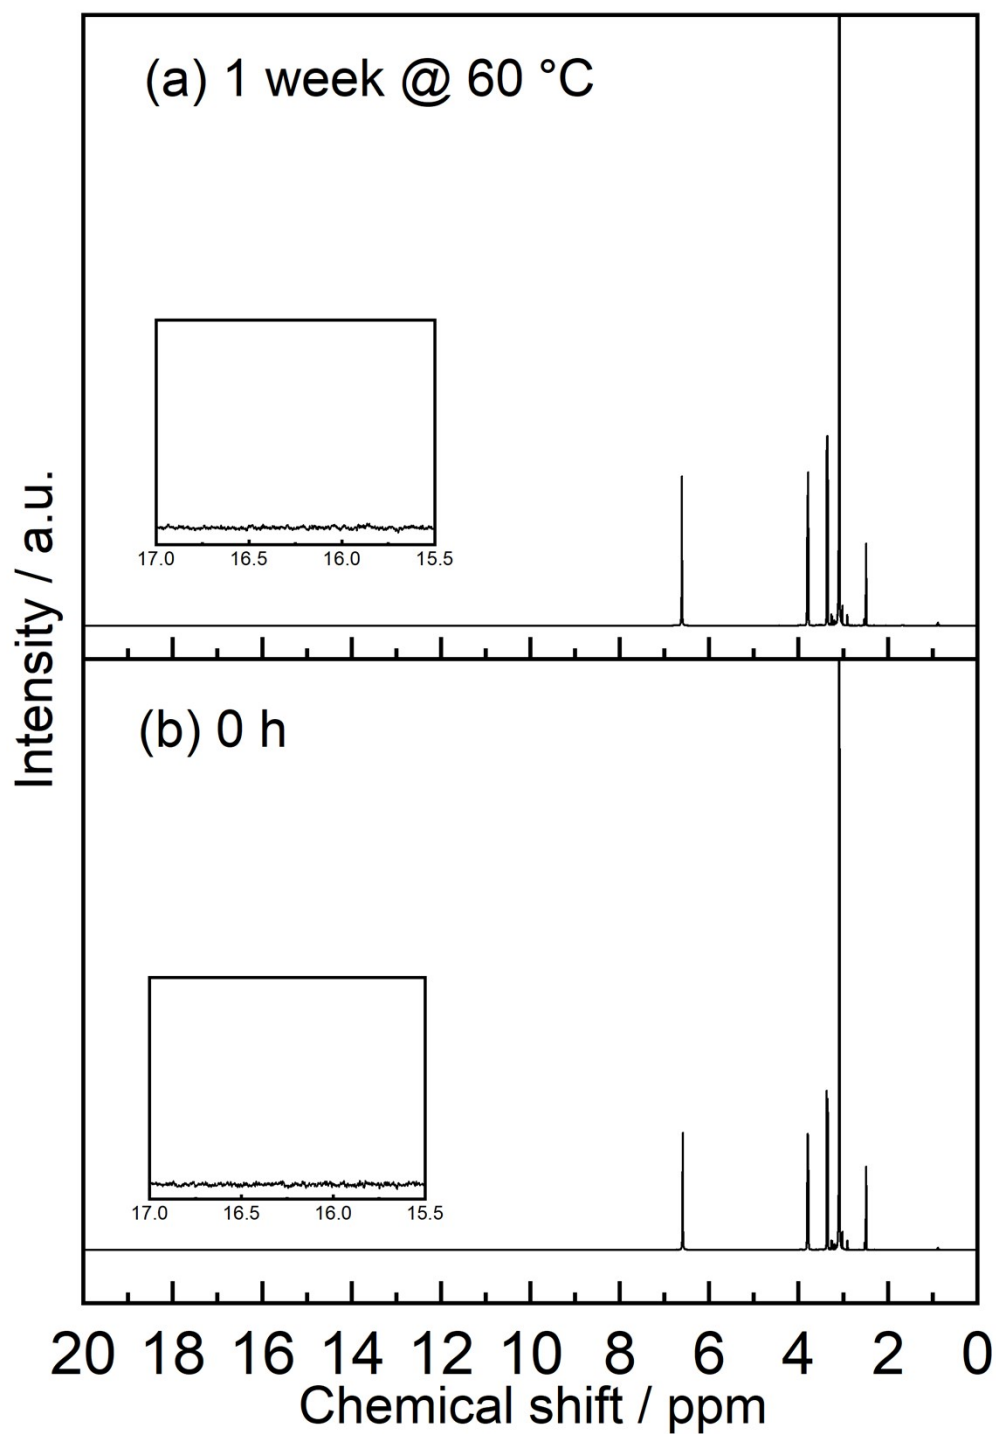

Figure S3.  $^1\text{H}$  NMR spectra of 0.4 m TMAF in  $\text{N}_{111}(\text{2OH})\text{TFSA}$  after (a) and before (b) stirring at 60 °C for one week.

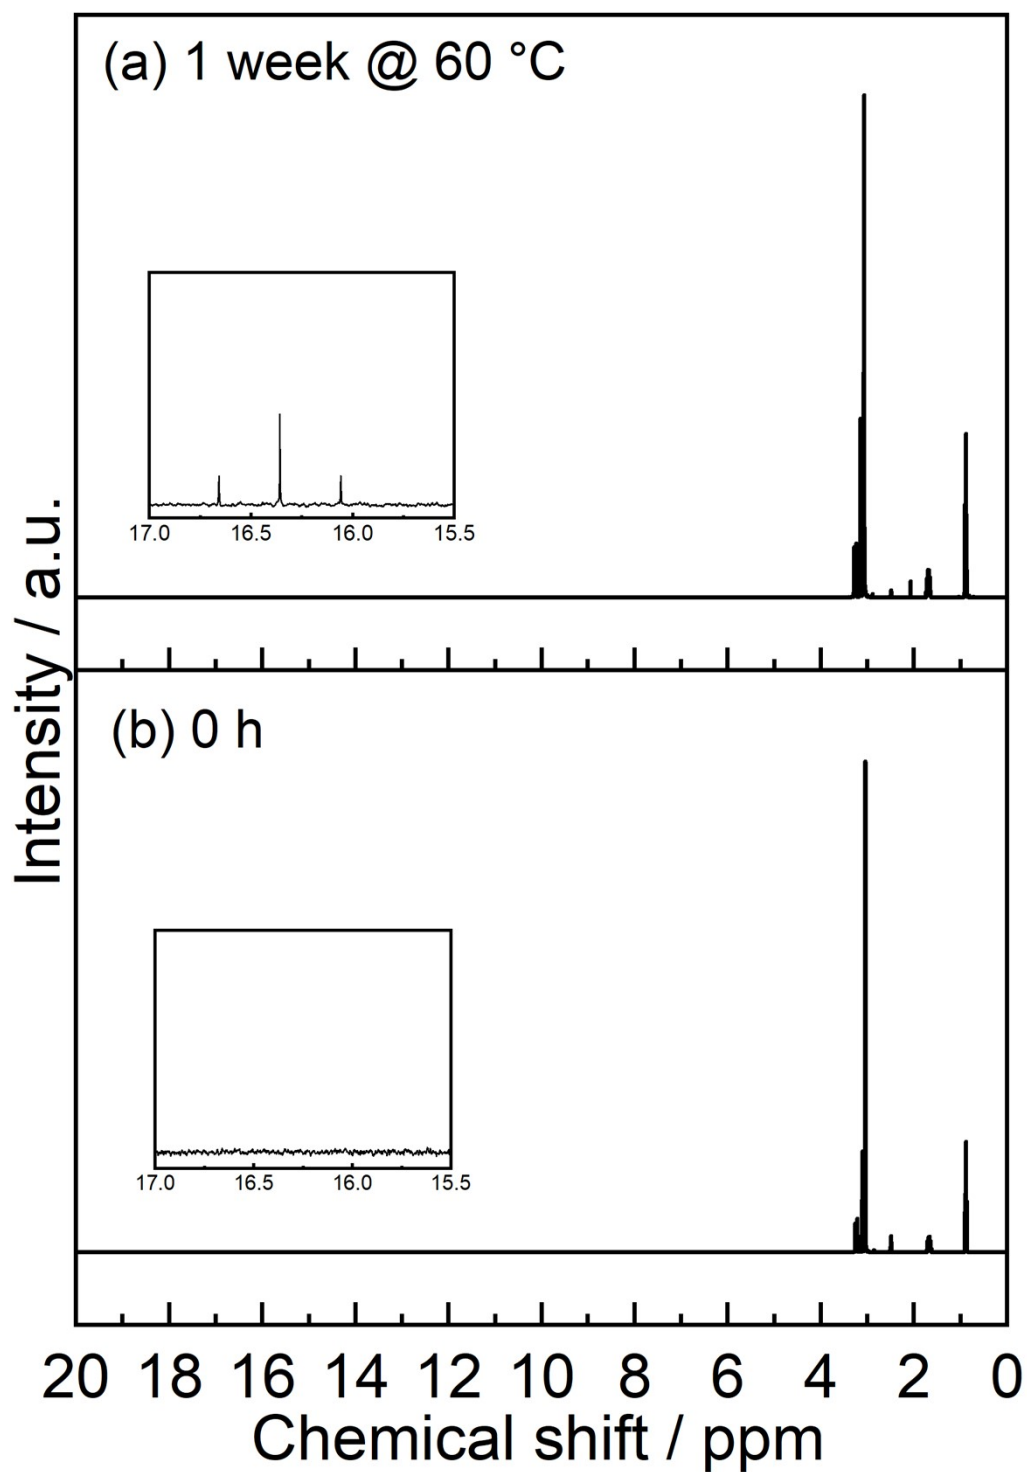

Figure S4.  $^1\text{H}$  NMR spectra of 0.4 m TMAF in  $\text{N}_{1113}\text{TFSA}$  after (a) and before (b) stirring at 60 °C for one week.

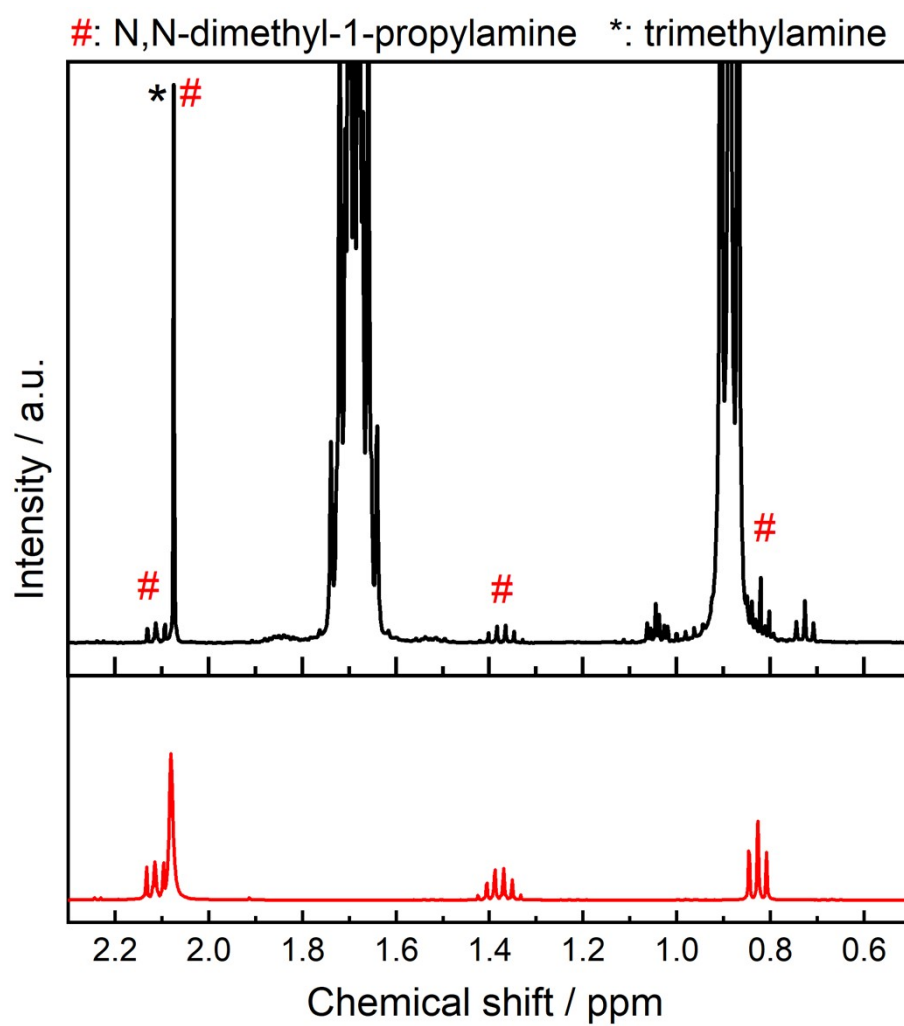

Figure S5.  $^1\text{H}$  NMR spectra of 0.4 m TMAF in  $\text{N}_{1113}\text{TFSA}$  after stirring at 60  $^\circ\text{C}$  for one week (top) and *N,N*-dimethyl-1-propylamine in  $\text{DMSO}-d_6$  (bottom).

(a) Hofmann elimination

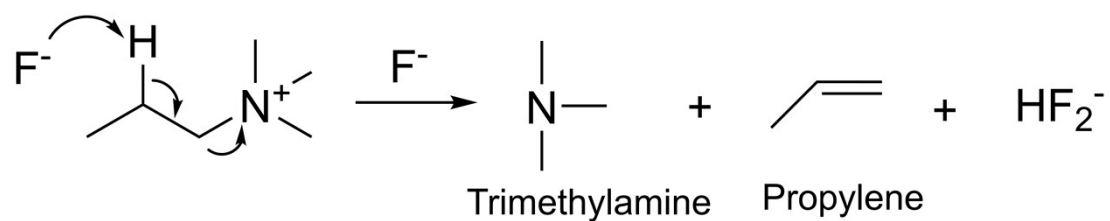

(b) Nucleophilic substitution

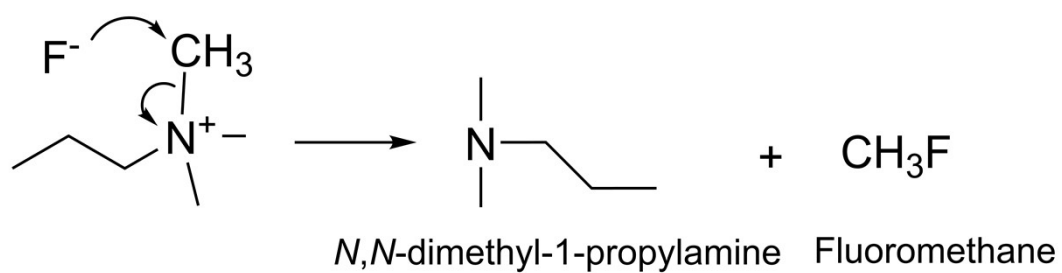

Figure S6. Possible decomposition reaction of  $\text{N}_{1113}^+$  cation with  $\text{F}^-$  ion: (a) Hofmann elimination (b) Nucleophilic substitution.

Table S1. Diffusion coefficient values of N<sub>111</sub>(2OH)TFSA electrolytes at various concentrations of TMAF at 60 °C. Diffusion coefficients were measured using the stimulated echo pulse sequence with the gradient pulse duration  $\delta$  of 3 ms, the diffusion time  $\Delta$  of 20 ms, and a maximum gradient strength of 10 T/m. Transport numbers for ions  $i$  were calculated by

$$t_i = \frac{N_i D_i}{N_{N111(2OH)^+} D_{N111(2OH)^+} + N_{TMA^+} D_{TMA^+} + N_{TFSA^-} D_{TFSA^-} + N_{F^-} D_{F^-}}, \text{ where } D \text{ and } N \text{ denote the diffusion coefficient and the number density of ions, respectively. Since we could not separate the chemical shifts of } N_{111(2OH)^+} \text{ and } TMA^+, \text{ we assumed that } D_{TMA^+} \text{ equals } D_{N111(2OH)^+}.$$

| Sample                                    | N <sub>111</sub> (2OH) <sup>+</sup><br>(x10 <sup>-11</sup> m <sup>2</sup> s <sup>-1</sup> ) | TFSA <sup>-</sup><br>(x10 <sup>-11</sup> m <sup>2</sup> s <sup>-1</sup> ) | F <sup>-</sup><br>(x10 <sup>-11</sup> m <sup>2</sup> s <sup>-1</sup> ) |
|-------------------------------------------|---------------------------------------------------------------------------------------------|---------------------------------------------------------------------------|------------------------------------------------------------------------|
| N <sub>111</sub> (2OH)TFSA                | 6.52                                                                                        | 4.33                                                                      | -                                                                      |
| 0.1 m TMAF in N <sub>111</sub> (2OH)TFSA  | 3.93                                                                                        | 3.6                                                                       | 3.16                                                                   |
| 0.25 m TMAF in N <sub>111</sub> (2OH)TFSA | 3.28                                                                                        | 3.05                                                                      | 2.34                                                                   |
| 0.4 m TMAF in N <sub>111</sub> (2OH)TFSA  | 2.62                                                                                        | 2.53                                                                      | 1.88                                                                   |
